# Supplementary material for: Quince peel polyphenolic extract blocks human colon adenocarcinoma LS174 cell growth and potentiates 5-fluorouracil efficacy
Source: Springer Nature journal article supplement (doi:10.1186/s12935-016-0276-7), 2015-12-01
Supplement: MOESM1 [file 9760872]

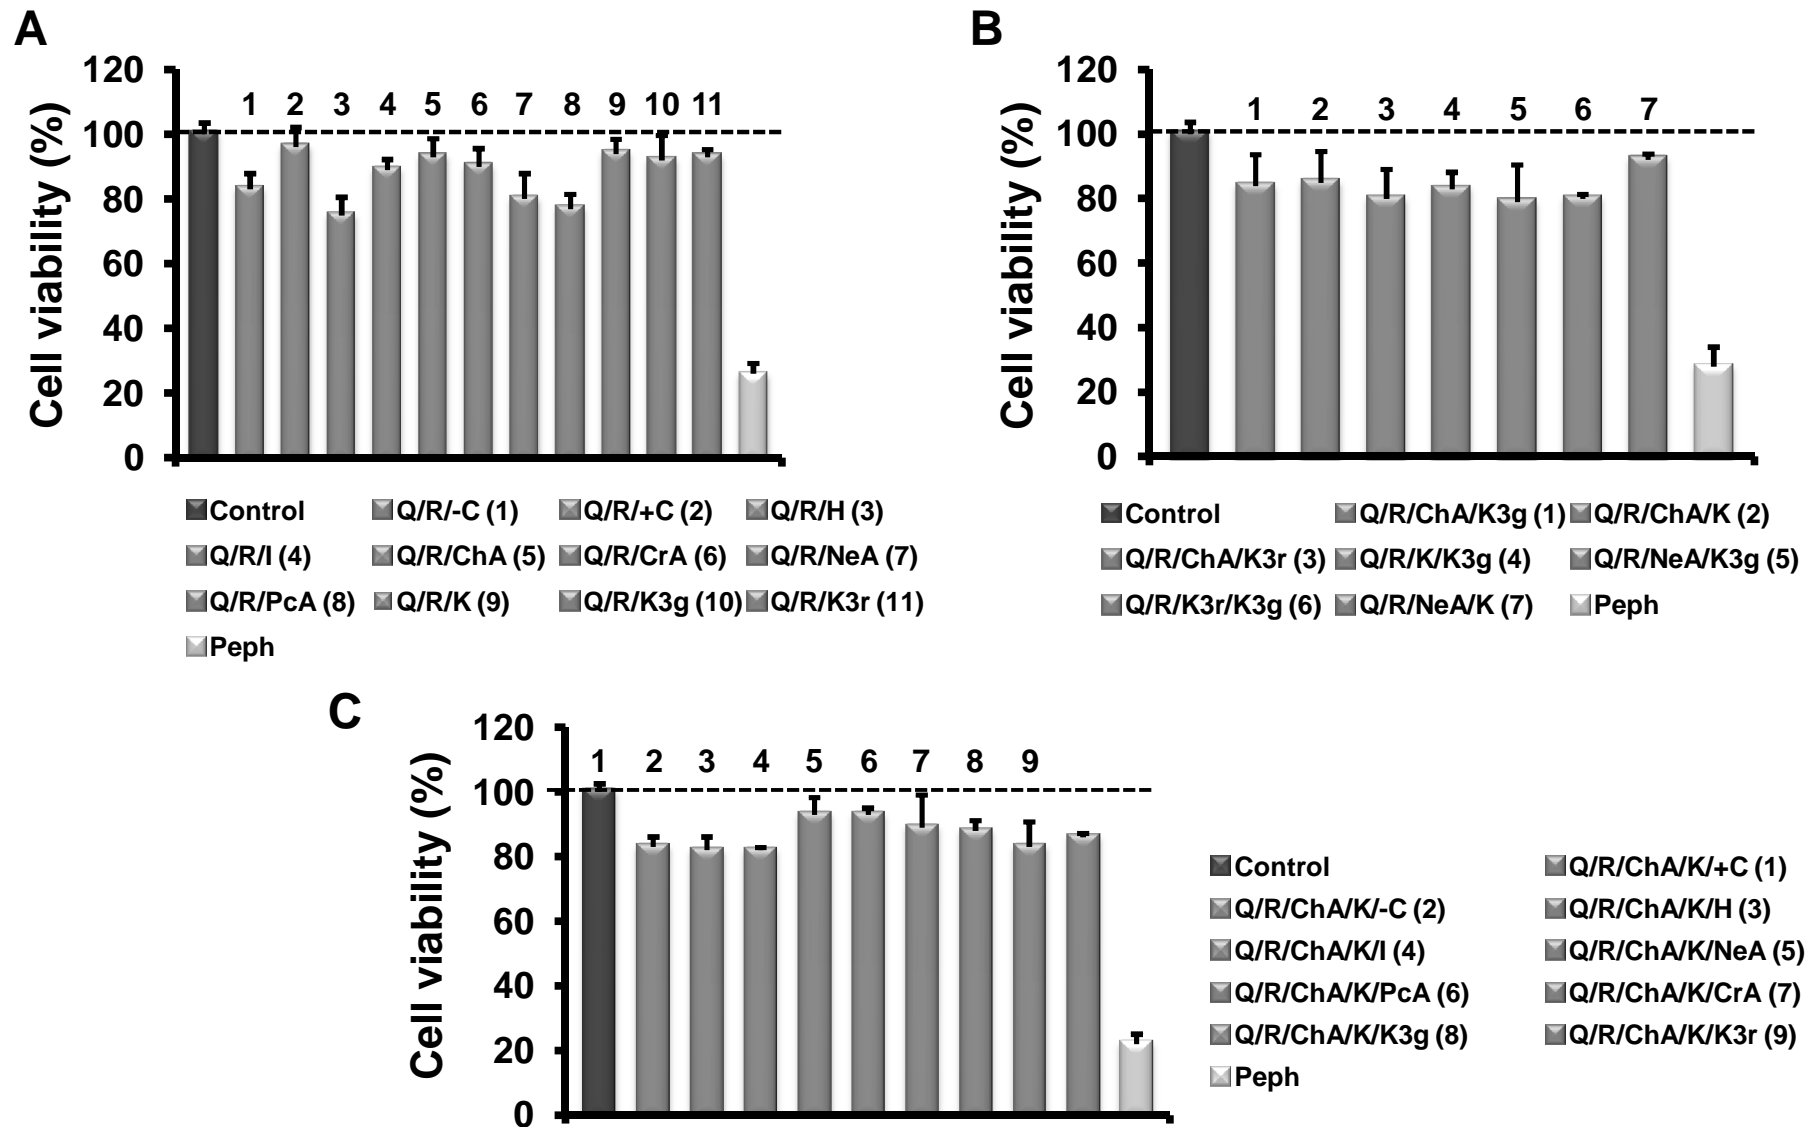

**Fig S1.** The effect of combination of Peph phenolic compounds on proliferation of LS174 cells compared to total Peph extract. Human colon adenocarcinoma LS174 cells were treated for 72h with different combinations (A. 3 combinations, B. 4 combinations, C. 5 combinations) of Peph phenolic compounds. All compounds were tested at equivalent concentrations to that present in 5µg/ml of the total peel polyphenolic extract. Cell viability was determined by MTT assay.
